# Supplementary material for: Intrinsic disorder and protein multibinding in domain, terminal, and linker regions
Source: Royal Society of Chemistry journal article supplement (doi:10.1039/c005144f), 2010-06-11
Supplement: c005144f.pdf [file c005144f.pdf]

## The role of intrinsic disorder in protein binding

Jessica H. Fong and Anna R. Panchenko

### Supplementary Information

**Figure S1.** Pairwise comparison of average fraction disorder in the footprint, interface, and overlap multibinding interface by three disorder prediction methods. Points with higher, equal, and lower fraction disorder are shown as circles, diamonds, and triangles, respectively. Families with statistically significant bias towards/against disorder on different regions are colored: green or blue, respectively, if significant by one disorder prediction method; or orange or red, respectively, if significant by at least two disorder prediction methods. (A) Footprint vs. interface by Disopred2. (B) Footprint vs. interface by FoldUnfold. (C) Footprint vs. interface by VSL2. (D) Multibinding interface vs. interface by Disopred2. (E) Multibinding interface vs. interface by FoldUnfold. (F) Multibinding interface vs. interface by VSL2.

(A)

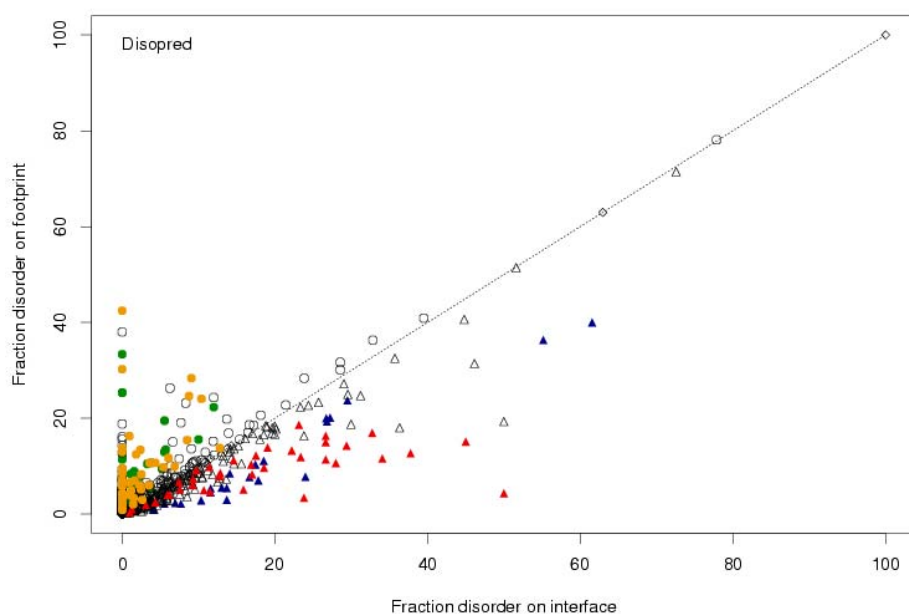

(B)

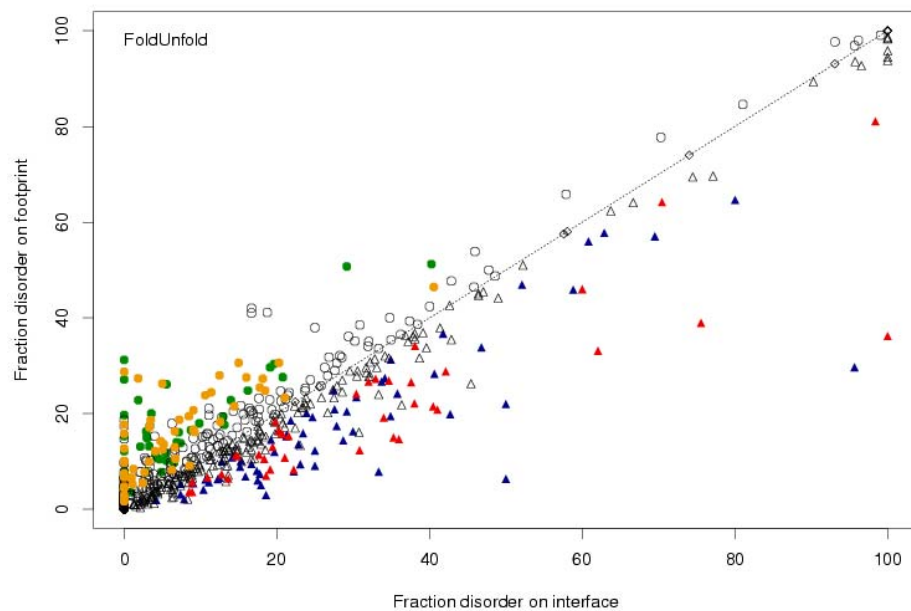

(C)

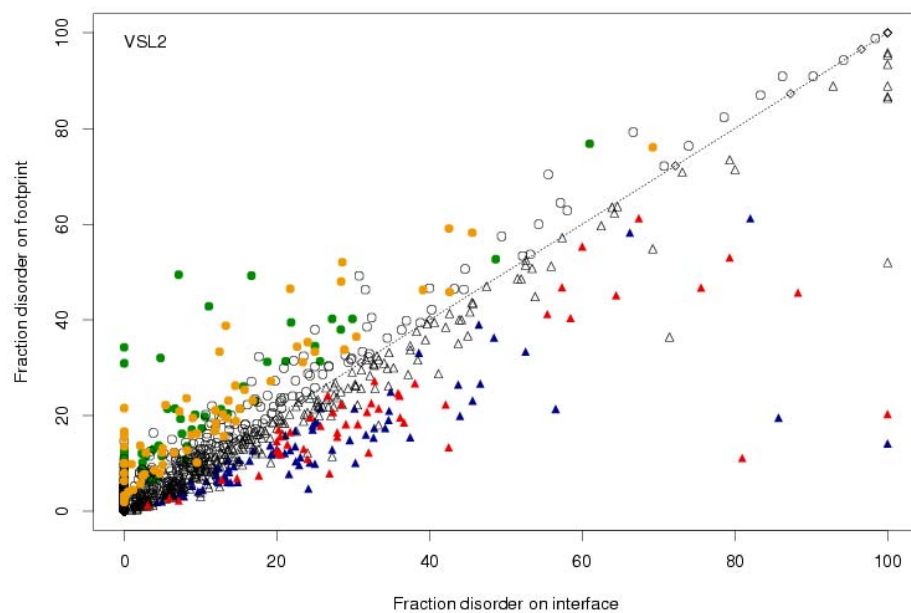

(D)

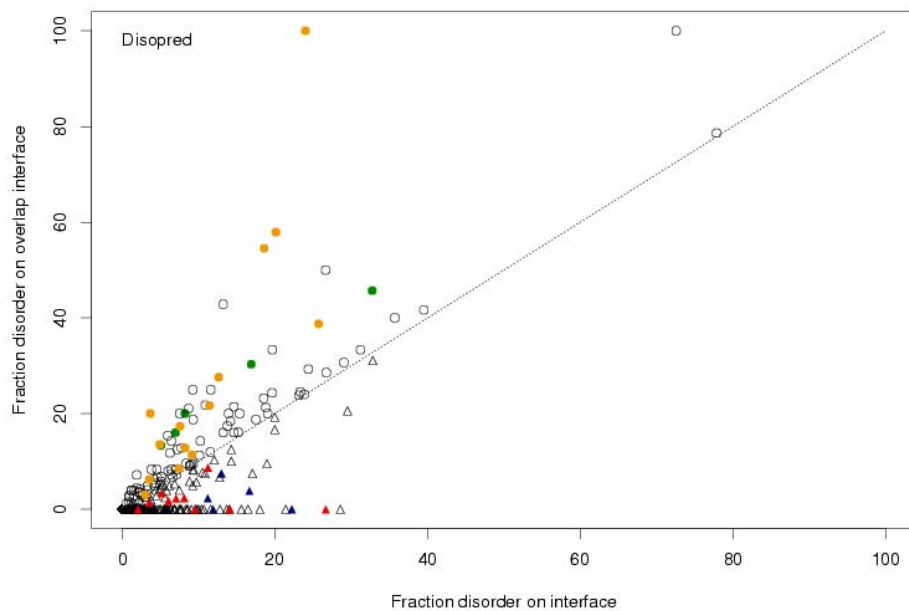

(E)

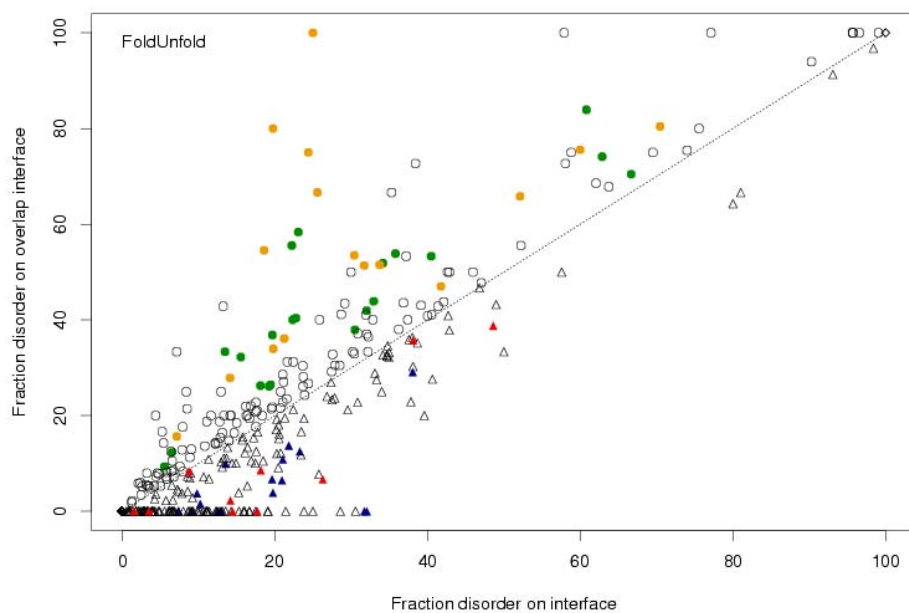

(F)

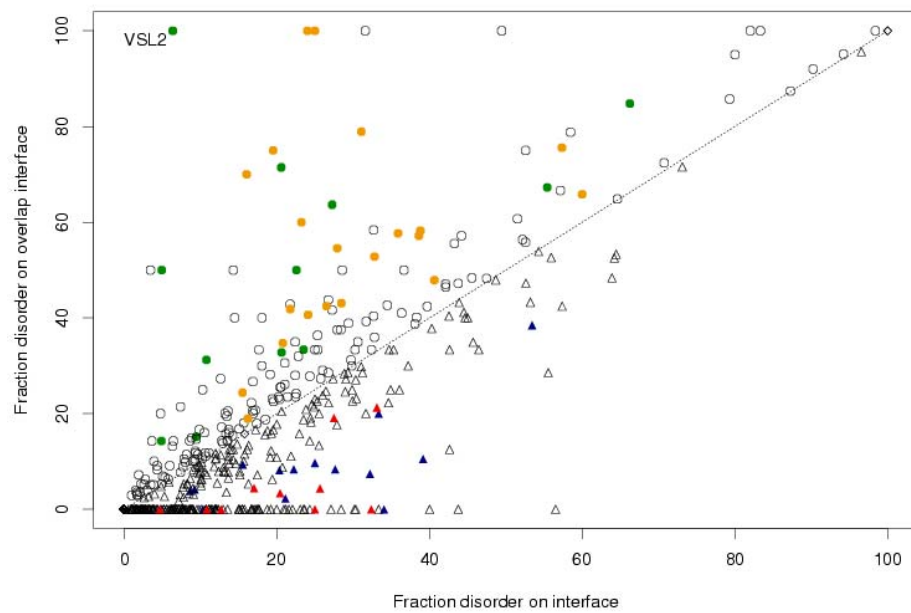

**Table S1.** Families with significant bias of disorder towards footprint, interface, or multibinding interface for at least two prediction methods (Disopred2: D, FoldUnfold: F, VSL2: V), and the number of domain-domain interactions observed in our dataset. The family name and CDD accession are taken from the representative structure for that family in our dataset.

| Family name             | Domain (CDD accession) | # Ints | Bias on interface over footprint | Bias on footprint over interface | Bias on interface over multi-binding interface | Bias on multi-binding interface over interface |
|-------------------------|------------------------|--------|----------------------------------|----------------------------------|------------------------------------------------|------------------------------------------------|
| FruK_PfkB_like          | cd01164                | 5      | F,V                              |                                  |                                                |                                                |
| PRK05382                | PRK05382               | 3      |                                  | D,V                              | F                                              |                                                |
| PRK12276                | PRK12276               | 1      |                                  | D,V                              | F                                              |                                                |
| NrfA                    | COG3303                | 1      |                                  | D,F                              |                                                |                                                |
| rve                     | pfam00665              | 1      |                                  | F,V                              |                                                |                                                |
| FBPase                  | cd00354                | 7      |                                  | F                                |                                                | D,V                                            |
| Flavokinase_C           | cd02064                | 14     | V                                |                                  |                                                |                                                |
| INB                     | smart00187             | 18     | F                                |                                  | F,V                                            |                                                |
| PRK09448                | PRK09448               | 7      |                                  |                                  |                                                | F,V                                            |
| PBPe                    | smart00079             | 6      |                                  | F,V                              |                                                |                                                |
| CASc                    | cd00032                | 4      | D,V                              |                                  | D,V                                            |                                                |
| Asparaginase            | cd00411                | 6      | F                                |                                  | F,V                                            |                                                |
| PRK05679                | PRK05679               | 2      | D,V                              |                                  |                                                | D,V                                            |
| NOS_oxygenase_euk       | cd00795                | 1      | D,V                              | F                                |                                                | D,V                                            |
| DHFR                    | cd00209                | 4      |                                  | V                                |                                                | D,V                                            |
| PRK10437                | PRK10437               | 3      |                                  | D,F,V                            |                                                |                                                |
| 14-3-3                  | pfam00244              | 1      | D,V                              |                                  |                                                |                                                |
| ZnMc_serralysin_like    | cd04277                | 15     | F                                |                                  |                                                |                                                |
| pgi                     | PRK00179               | 1      | D,F,V                            |                                  |                                                |                                                |
| Lyase_I                 | cd01334                | 4      | D,F                              |                                  | F                                              |                                                |
| Chorismate_bind         | pfam00425              | 4      |                                  | D,F,V                            | F                                              |                                                |
| proteasome_alpha_type_6 | cd03754                | 13     | F                                |                                  | D,V                                            |                                                |
| PRK11556                | PRK11556               | 1      |                                  | D,V                              |                                                |                                                |
| PAP2_acid_phosphatase   | cd03397                | 3      |                                  | F,V                              |                                                |                                                |
| ALBUMIN                 | cd00015                | 5      | V                                |                                  |                                                |                                                |
| FGF                     | smart00442             | 4      |                                  |                                  |                                                | D                                              |
| GHB                     | smart00068             | 1      | F,V                              |                                  |                                                |                                                |

## Supplementary Material (ESI) for Molecular BioSystems

This journal is (c) The Royal Society of Chemistry, 2010

|                     |            |    |       |       |       |     |
|---------------------|------------|----|-------|-------|-------|-----|
| HELICc              | cd00079    | 7  | D,F,V |       | D     |     |
| KISc_KIF1A_KIF1B    | cd01365    | 2  | F     | D,V   |       |     |
| PLAT_PL             | cd01759    | 2  | D,F,V |       |       | D   |
| PIPKc               | smart00330 | 1  | D,V   |       |       |     |
| Calpain_III         | pfam01067  | 1  | D,F   |       |       |     |
| catalase_peroxidase | cd00649    | 3  | D,V   | F     | D     |     |
| Ring_hydroxyl_A     | pfam00848  | 4  | D     | V     |       | D,V |
| GlyRS_anticodon     | cd00858    | 6  |       | F,V   |       | V   |
| GlyRS-like_core     | cd00774    | 21 |       | D     |       | D   |
| PARP                | pfam00644  | 1  |       | D,F   |       |     |
| RuBisCO_large       | pfam00016  | 8  |       | D     |       |     |
| Asp                 | pfam00026  | 2  |       | D,F,V |       |     |
| Sod_Fe_N            | pfam00081  | 6  | F     |       | F,V   |     |
| Hormone_1           | pfam00103  | 2  | D,F,V |       | D,F   |     |
| E1-E2_ATPase        | pfam00122  | 4  |       |       |       |     |
| RIP                 | pfam00161  | 3  |       | D,F   |       |     |
| Ribosomal_S4        | pfam00163  | 1  |       | D,F   |       |     |
| Catalase            | pfam00199  | 5  | F,V   |       |       |     |
| Orn_DAP_Arg_deC     | pfam00278  | 3  |       | D,V   |       |     |
| BluB                | cd02145    | 1  |       | F,V   |       |     |
| GHMP_kinases_N      | pfam00288  | 1  | D,F,V |       |       |     |
| PRK00737            | PRK00737   | 3  |       |       | V     |     |
| Molybdopterin       | pfam00384  | 8  |       | F,V   |       |     |
| DNA_pol_A           | pfam00476  | 3  | F,V   |       |       |     |
| Flavi_glycoprot     | pfam00869  | 5  |       | F     | F,V   |     |
| Tissue_fac          | pfam01108  | 4  | F,V   |       |       |     |
| Globin              | pfam00042  | 9  |       |       |       | D   |
| RNase_PH            | pfam01138  | 6  | V     |       | D,V   |     |
| Cu_amine_oxid       | pfam01179  | 9  | D,V   |       | D,F,V |     |
| Inos-1-P_synth      | pfam01658  | 2  |       | D,F,V |       |     |
| Terpene_synth       | pfam01397  | 1  |       | F,V   |       |     |
| Peptidase_M41       | pfam01434  | 1  | D,F,V |       |       |     |
| Transglut_core      | pfam01841  | 3  | D     |       | D,V   |     |
| Cytochrom_C1        | pfam02167  | 7  |       | V     |       | F,V |
| Lyase_8             | pfam02278  | 2  |       | F,V   |       |     |
| Seryl_tRNA_N        | pfam02403  | 2  |       | D,F   |       |     |
| PRK02256            | PRK02256   | 3  | F,V   |       | F     |     |
| DNA_pol3_beta_3     | pfam02768  | 2  | D,F,V |       |       |     |
| Semialdhyde_dhC     | pfam02774  | 6  |       |       | D,F   |     |
| Transket_pyr        | pfam02779  | 5  |       | D,V   |       |     |
| RuBisCO_large_N     | pfam02788  | 5  |       | D,F,V |       | F   |

## Supplementary Material (ESI) for Molecular BioSystems

This journal is (c) The Royal Society of Chemistry, 2010

|                     |            |    |       |       |       |     |
|---------------------|------------|----|-------|-------|-------|-----|
| Chal_sti_synt_C     | pfam02797  | 4  |       | D,F,V |       | D,F |
| STAT_bind           | pfam02864  | 2  |       | D,V   |       |     |
| Ldh_1_C             | pfam02866  | 4  |       | F,V   |       |     |
| MurB_C              | pfam02873  | 1  | F,V   |       |       |     |
| ATP-synt_ab_N       | pfam02874  | 3  |       | D,F,V |       |     |
| PARP_reg            | pfam02877  | 1  |       | D,F   |       |     |
| SRP54_N             | pfam02881  | 1  |       | D,F   |       |     |
| TetR_C              | pfam02909  | 3  |       |       | D,F,V |     |
| Formyl_trans_C      | pfam02911  | 1  |       | F,V   | D,F,V |     |
| FAD_binding_7       | pfam03441  | 1  |       | D,V   |       |     |
| petB                | CHL00070   | 9  |       | D,V   |       | F,V |
| PRK10518            | PRK10518   | 3  | F     |       | F,V   | D   |
| PUD                 | pfam03714  | 1  |       | F,V   | F,V   | D   |
| PRCH                | pfam03967  | 3  |       | V     |       | F,V |
| SPOUT_MTase         | pfam02590  | 1  |       | D,F   |       | F,V |
| RNA_pol_Rpb1_1      | pfam04997  | 11 |       | D,F   |       |     |
| Peptidase_M16_C     | pfam05193  | 5  |       |       | D,V   | F   |
| groEL               | PRK00013   | 5  |       |       |       | F,V |
| iPGM_N              | pfam06415  | 1  | F,V   |       |       |     |
| FtsH_ext            | pfam06480  | 1  | D,V   |       |       |     |
| Myotub-related      | pfam06602  | 1  |       | D,F,V | V     |     |
| RIBOc               | smart00535 | 1  |       | D,V   |       |     |
| FERM_M              | pfam00373  | 15 | F,V   |       | V     |     |
| PDZ_serine_protease | cd00987    | 6  | F,V   |       | F     | V   |
| A2M_N_2             | pfam07703  | 1  | D,F   |       |       |     |
| Plug                | pfam07715  | 1  | D,F   |       |       |     |
| lamB                | PRK09360   | 1  |       | F,V   |       |     |
| PRK12677            | PRK12677   | 3  | D,F,V |       | D,V   |     |
| IMD                 | pfam08397  | 1  |       | D,F,V |       |     |
| PepX_C              | pfam08530  | 3  |       | D,F   |       |     |
| GCV_T_C             | pfam08669  | 3  | D,F   |       |       |     |
| TR_THY              | smart00095 | 4  |       | D,F   |       |     |
| PTPc                | cd00047    | 6  |       | D,F,V |       |     |
| PRK07157            | PRK07157   | 1  |       | F,V   |       |     |
| Transpeptidase      | pfam00905  | 5  | F,V   |       |       |     |
| PRK08292            | PRK08292   | 5  | F,V   |       |       |     |
| PRK11883            | PRK11883   | 9  | F,V   |       |       |     |
| PRK05716            | PRK05716   | 9  | F,V   |       |       |     |
| Rep_fac-A_3         | pfam08661  | 10 | F     |       | F     |     |
| TMADH_HD_FMN        | cd02929    | 33 | F,V   |       | F,V   |     |
